# Supplementary material for: Sorption of CO2, CH4 and Their Mixtures in Amorphous Poly(2,6-dimethyl-1,4-phenylene)oxide (PPO)
Source: MDPI journal article supplement (doi:10.3390/polym15051144), 2023-02-24
Supplement: s1 [file s1]

## Supplementary Material

### Sorption of CO<sub>2</sub>, CH<sub>4</sub> and their mixtures in Amorphous Poly(2,6-dimethyl-1,4-phenylene)oxide (PPO)

Valerio Loianno, Antonio Baldanza, Giuseppe Scherillo, Pellegrino Musto and Giuseppe Mensitieri

**Table S1.** Mixed gas sorption experiments: solubility of CO<sub>2</sub> (component #1) in amorphous PPO.

| T (°C)     | P (Torr)  | x <sub>1</sub> (mol mol <sup>-1</sup> ) | C <sub>1</sub> (cm <sup>3</sup> <sub>STP</sub> cm <sup>-3</sup> <sub>PPO</sub> ) |
|------------|-----------|-----------------------------------------|----------------------------------------------------------------------------------|
| 35.00±0.02 | 214.3±1.1 | 0.360                                   | 0.849                                                                            |
| 35.00±0.02 | 426.8±2.1 | 0.368                                   | 1.611                                                                            |
| 35.00±0.02 | 528.8±2.6 | 0.376                                   | 2.087                                                                            |
| 35.00±0.02 | 745.8±3.7 | 0.377                                   | 3.014                                                                            |
| 35.00±0.02 | 999.1±5.0 | 0.379                                   | 4.020                                                                            |
| 35.00±0.02 | 450.2±2.2 | 0.502                                   | 2.615                                                                            |
| 35.00±0.02 | 557.4±2.8 | 0.495                                   | 3.078                                                                            |
| 35.00±0.02 | 705.2±3.5 | 0.510                                   | 4.036                                                                            |
